# Supplementary material for: NMR side-chain assignments of the Crimean-Congo haemorrhagic fever virus glycoprotein n cytosolic domain
Source: Copernicus journal article supplement (doi:10.5194/mr-2024-6), 2024-04-10
Supplement: Supplementary file 1 [file mr-2024-6-supplement.pdf]

Supporting information for:

## NMR side-chain assignments of the Crimean-Congo haemorrhagic fever virus glycoprotein n cytosolic domain

Louis Brigandat<sup>#1</sup>, Maëlys Laux<sup>#1</sup>, Caroline Marteau<sup>1</sup>, Laura Cole<sup>1</sup>, Anja Böckmann<sup>1</sup>, Lauriane Lecoq<sup>1</sup>, Marie-Laure Fogeron<sup>1</sup>, Morgane Callon<sup>1</sup>

<sup>1</sup>MMSB Lyon, UMR5086 CNRS Lyon University, 7, passage du Vercors, 69367 Lyon Cedex 07, France

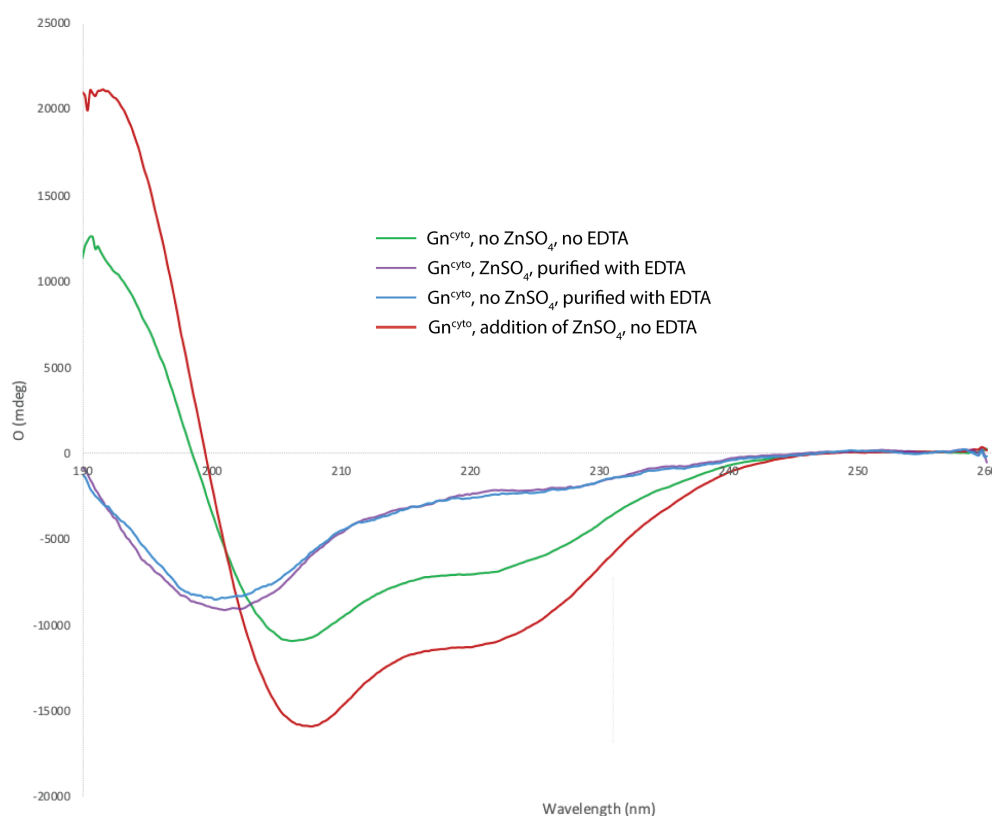

**Figure S1:** Circular dichroism spectra of Gn<sup>cyto</sup> showing that addition of EDTA causes loss of secondary structure content due to Zn<sup>2+</sup> depletion, both when synthesized in the presence (purple line) or in the absence (blue line) of ZnSO<sub>4</sub>. When the protein is synthesized without addition of ZnSO<sub>4</sub>, secondary structure is observed (green curve), likely by use of ions present in the extract, but the features are less pronounced than when ZnSO<sub>4</sub> is added to the cell-free reaction (red curve).

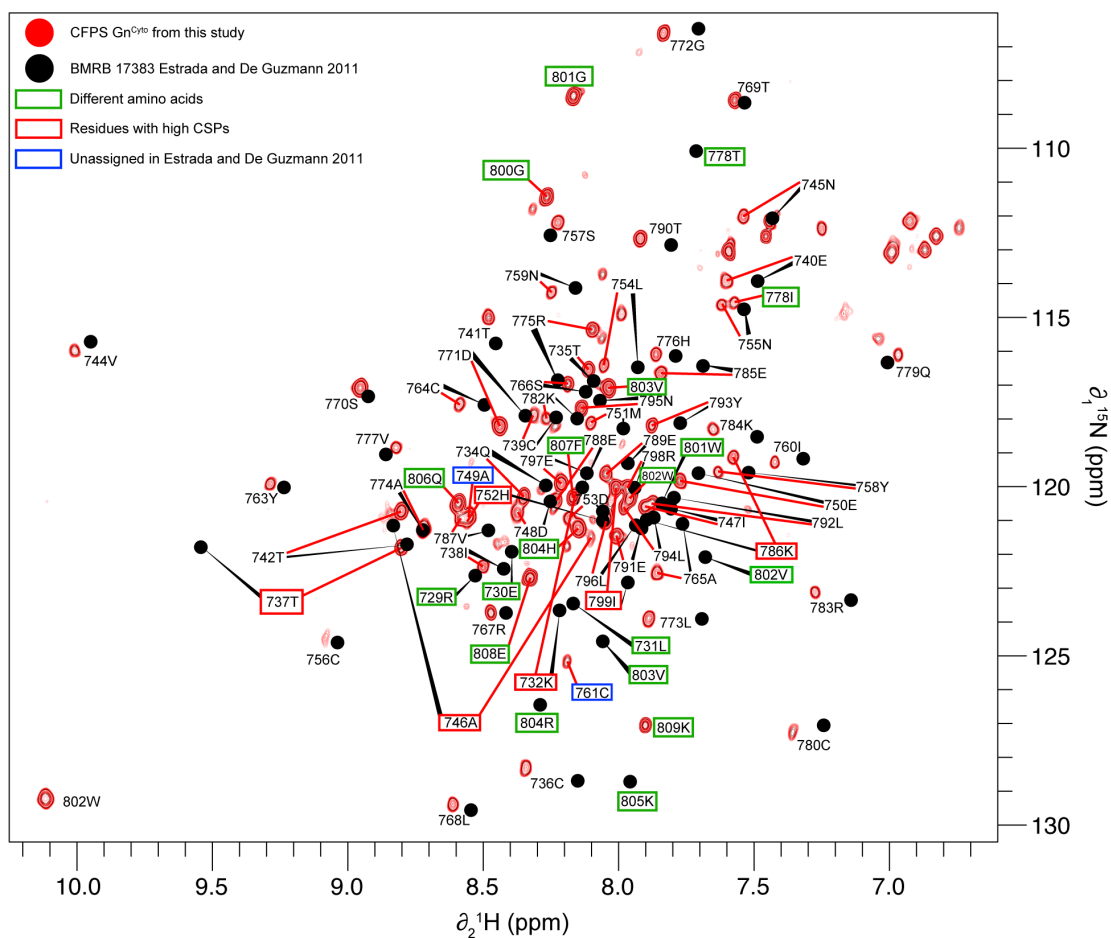

**Figure S2:** Comparison between the  $^{15}\text{N}$  HSQC spectrum recorded on the CFPS Gn<sup>cyto</sup> sample in red, compared to a simulation using the chemical shifts deposited in the BMRB 17383 (Estrada and De Guzman, 2011). The sequences of the analyzed proteins are shown in Figure S3.

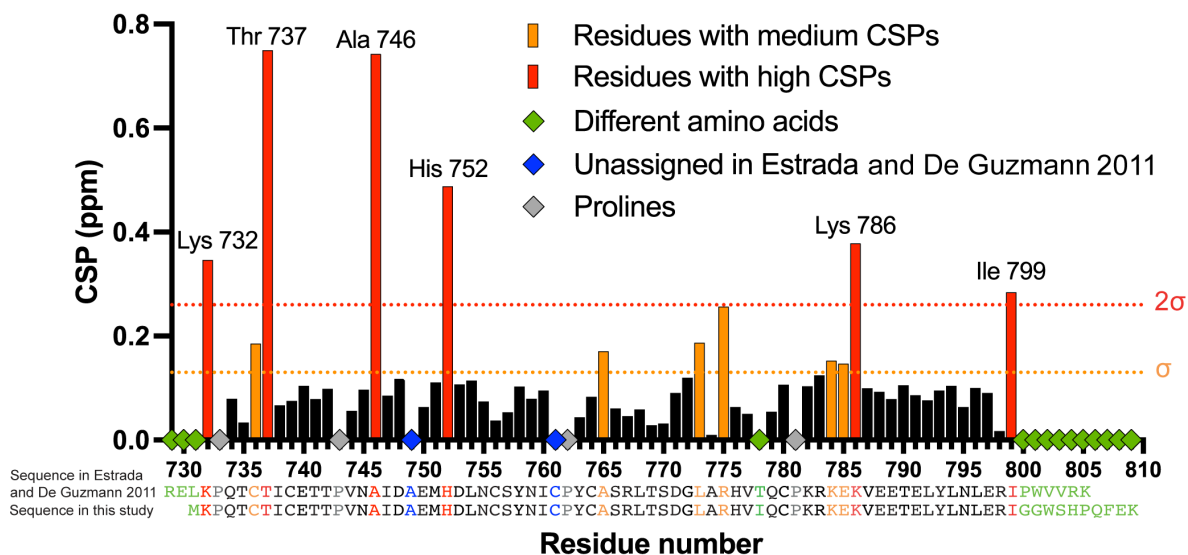

**Figure S3:** CSPs, calculated according to  $CSP =$

$$\sqrt{(\partial^1 H_1 - \partial^1 H_2)^2 + \left( \frac{\gamma^{15N}}{\gamma^1 H} (\partial^{15} N_1 - \partial^{15} N_2) \right)^2},$$

where  $\partial^1 H$  stands for the amide proton chemical shift,  $\partial^{15} N$  is the amide nitrogen chemical shift,  $\gamma^{15N}$  is the gyromagnetic ratio of nitrogen and  $\gamma^1 H$  the proton gyromagnetic ratio. Differences in the amino-acid sequence are highlighted.

## References

Estrada, D. F. and De Guzman, R. N.: Structural Characterization of the Crimean-Congo Hemorrhagic Fever Virus Gn Tail Provides Insight into Virus Assembly, *Journal of Biological Chemistry*, 286, 21678–21686, <https://doi.org/10.1074/jbc.M110.216515>, 2011.
